# Supplementary material
Source: PubMed Central journal article supplement (PMC2740491)
Supplement: NIHMS124649-supplement-ESI.pdf [file NIHMS124649-supplement-ESI.pdf]

**Europium(III) Macrocyclic Complexes with Alcohol Pendant Arms as Chemical  
Exchange Saturation Transfer (CEST) Agents**

**Electronic Supplementary Information**

Mark Woods,<sup>†±</sup> Donald E. Woessner,<sup>∞</sup> Piyu Zhao,<sup>±</sup> Azhar Pasha,<sup>±</sup> Meng-Yin Yang,<sup>‡</sup> Olga  
Vasalitiy,<sup>±</sup> Janet R. Morrow,<sup>‡\*</sup> A. Dean Sherry<sup>±∞\*</sup>

<sup>†</sup> Macrocyclics, 2110 Research Row, Suite 425, Dallas, TX 75235, USA.

<sup>±</sup> Department of Chemistry, University of Texas at Dallas, P.O. Box 830668, Richardson,  
TX 75083, USA.

E-mail: sherry@utdallas.edu

<sup>∞</sup> Department of Radiology & the Advanced Imaging Research Center, University of  
Texas Southwestern Medical Center, Harry Hines Boulevard, Dallas, TX 75235, USA.

E-mail: dean.sherry@utsouthwestern.edu

<sup>‡</sup> Department of Chemistry, State University of New York at Buffalo, Amherst, NY  
14260, USA.

E-mail: jmorrow@buffalo.edu

Keywords: Contrast Agents, PARACEST agents, Lanthanides, Macrocyclic Ligands.

## Electronic Supplementary Information Sheet 1

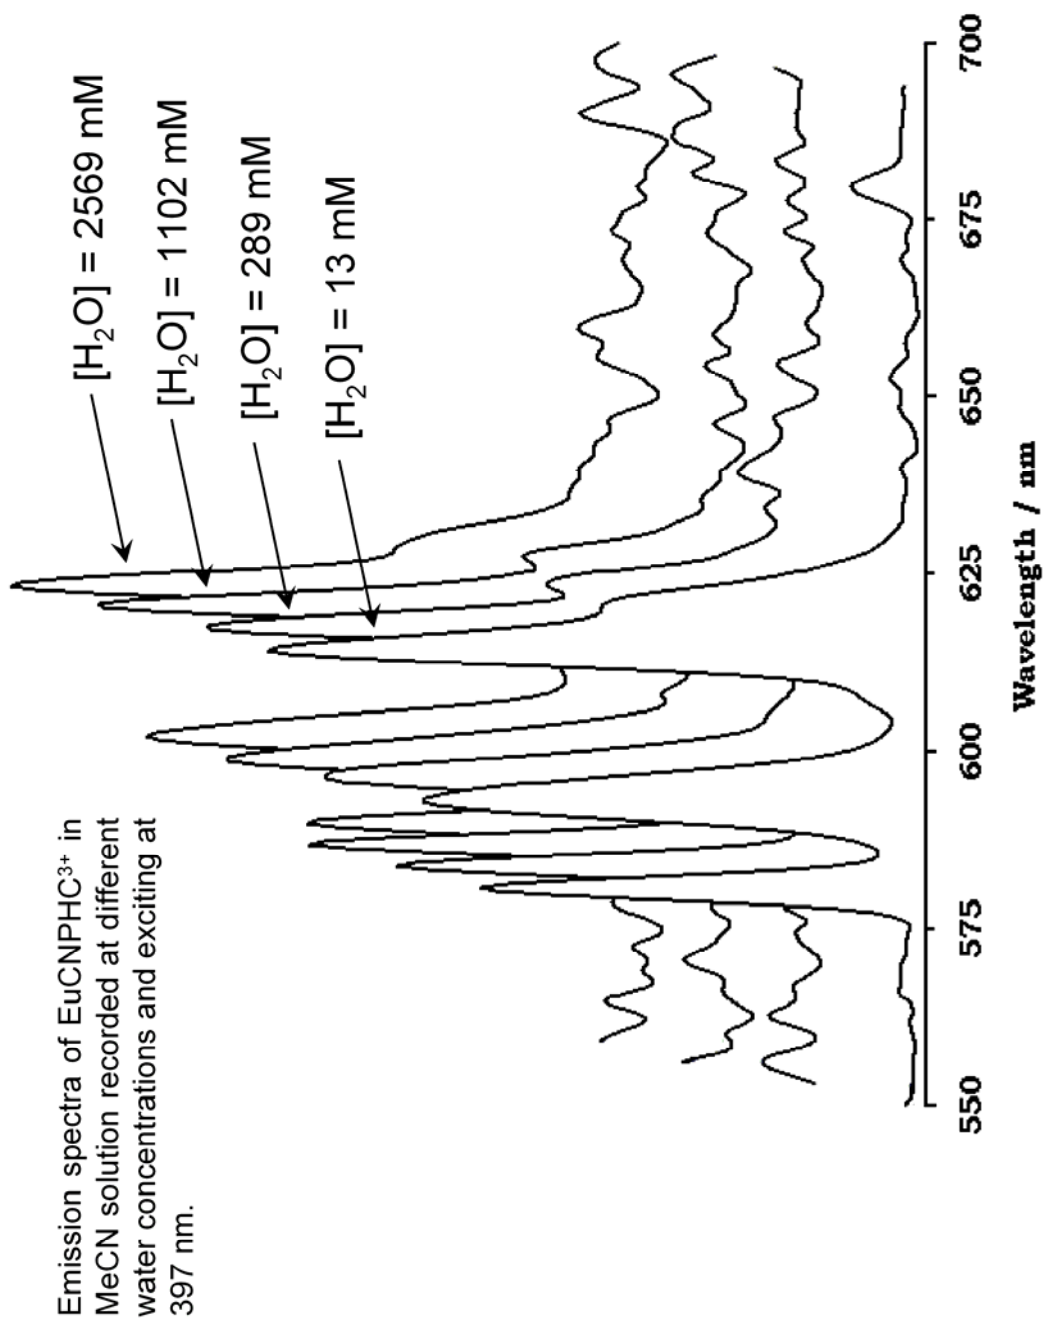

## Electronic Supplementary Information Sheet 2

| H <sub>2</sub> O molecules<br>per EuL | T <sub>1</sub> / ms |        |        |                    |                       |          |    |
|---------------------------------------|---------------------|--------|--------|--------------------|-----------------------|----------|----|
|                                       | Hydroxyl Protons    |        |        | Eu-OH <sub>2</sub> | Bulk H <sub>2</sub> O | Amide NH |    |
| 19 ppm                                | 16 ppm              | 14 ppm | -1 ppm |                    |                       | -2 ppm   |    |
| 0.18                                  | 39                  | 39     | 39     | —                  | 102                   | —        | 39 |
| 6.93                                  | 40                  | 40     | 39     | —                  | 165                   | —        | —  |
| 14.35                                 | 40                  | 40     | 39     | —                  | 232                   | —        | —  |
| 21.80                                 | Broad               | Broad  | Broad  | —                  | 274                   | —        | —  |
| 29.25                                 | Broad               | Broad  | Broad  | —                  | 334                   | —        | —  |
| 44.18                                 | Broad               | Broad  | Broad  | —                  | 444                   | —        | —  |
| 59.12                                 | —                   | —      | —      | —                  | 573                   | —        | —  |
| 74.05                                 | —                   | —      | —      | —                  | 678                   | —        | —  |

**Table 1.** The experimentally determined T<sub>1</sub> values of the exchanging protons in the EuCNPHC<sup>3+</sup> complex. Peaks that had exchange broadened to an extent that T<sub>1</sub> could not be reliably measured are denoted “broad” and dashed entries indicate that the peak could not be seen or sufficiently resolved to measure T<sub>1</sub>.

## Electronic Supplementary Information Sheet 3

### Equations used for fitting the 6 exchanging pool system EuCNPfC<sup>3+</sup>

The six pools of protons are designated by A, B, C, D, E, and F. Each of them is characterized by equilibrium Z magnetization designated by  $M_0^i$  where  $i$  is one of the designations.  $M_0^i$  is directly proportional to the number of protons in pool  $i$ . Also, each pool is characterized by:

$M_x^i$ ,  $M_y^i$ , and  $M_z^i$ , the X, Y, and Z magnetizations at any time

$\omega_i$ , the Larmor frequency of pool  $i$ , in  $\text{rad s}^{-1}$

$T_{1i}$ , the spin-lattice relaxation time, in seconds

$T_{2i}$ , the transverse relaxation time, in seconds.

Two other parameters that appear in the equations are the NMR spectrometer settings:

$\omega$ , the irradiation frequency of the spectrometer

$\omega_1$ , the strength of the irradiation, in  $\text{rad s}^{-1}$  [equal to  $2\pi B_1$ , where  $B_1$  is in Hz].

Protons of pool A can exchange with pools B, C, D, E, and F but protons of pools B, C, D, E, and F do not exchange with other.

In the differential equations given below, the exchange rates for protons leaving pools B, C, D, E, and F and entering pool A are

$$C_{ba} = 1/\tau_b \quad (1)$$

$$C_{ca} = 1/\tau_c \quad (2)$$

$$C_{da} = 1/\tau_d \quad (3)$$

$$C_{ea} = 1/\tau_e \quad (4)$$

$$C_{fa} = 1/\tau_f \quad (5)$$

in which  $\tau_i$  is the average lifetime of a proton in pool i. The principle of detailed balance gives us the exchange rates for protons to leave pool A and enter each of the other pools:

$$C_{ab} = (M_0^b / M_0^a) C_{ba} \quad (6)$$

$$C_{ac} = (M_0^c / M_0^a) C_{ca} \quad (7)$$

$$C_{ad} = (M_0^d / M_0^a) C_{da} \quad (8)$$

$$C_{ae} = (M_0^e / M_0^a) C_{ea} \quad (9)$$

$$C_{af} = (M_0^f / M_0^a) C_{fa} \quad (10)$$

and then, the rate for protons to leave pool A is

$$C_a = C_{ab} + C_{ac} + C_{ad} + C_{ae} + C_{af}$$

In order to simplify the equations, some of the parameters are lumped into new parameters:

$$k_{1a} = 1/ T_{1a} + C_a \quad (11)$$

$$k_{2a} = 1/ T_{2a} + C_a \quad (12)$$

$$k_{1b} = 1/ T_{1b} + C_{ba} \quad (13)$$

$$k_{2b} = 1/ T_{2b} + C_{ba} \quad (14)$$

$$k_{1c} = 1/ T_{1c} + C_{ca} \quad (15)$$

$$k_{2c} = 1/ T_{2c} + C_{ca} \quad (16)$$

$$k_{1d} = 1/T_{1d} + C_{da}$$

(17)

$$k_{2d} = 1/T_{2d} + C_{da}$$

(18)

$$k_{1e} = 1/T_{1e} + C_{ea}$$

(19)

$$k_{2e} = 1/T_{2e} + C_{ea}$$

(20)

$$k_{1f} = 1/T_{1f} + C_{fa}$$

(21)

$$k_{2f} = 1/T_{2f} + C_{fa}$$

(22)

The time dependencies of the various magnetizations while irradiated by the RF pulse are given by the solution of the following set of 18 coupled differential equations:

$$dM_x^a/dt = -k_{2a} M_x^a + C_{ba} M_x^b + C_{ca} M_x^c + C_{da} M_x^d + C_{ea} M_x^e + C_{fa} M_x^f + (\omega - \omega_a) M_y^a$$

(23)

$$dM_x^b/dt = C_{ab} M_x^a - k_{2b} M_x^b + (\omega - \omega_b) M_y^b$$

(24)

$$dM_x^c/dt = C_{ac} M_x^a - k_{2c} M_x^c + (\omega - \omega_c) M_y^c$$

(25)

$$dM_x^d/dt = C_{ad} M_x^a - k_{2d} M_x^d + (\omega - \omega_d) M_y^d$$

(26)

$$dM_x^e/dt = C_{ae} M_x^a - k_{2e} M_x^e + (\omega - \omega_e) M_y^e$$

(27)

$$dM_x^f/dt = C_{af} M_x^a - k_{2f} M_x^f + (\omega - \omega_f) M_y^f$$

(28)

$$dM_y^a/dt = (\omega_a - \omega) M_x^a - k_{2a} M_y^a + C_{ba} M_y^b + C_{ca} M_y^c + C_{da} M_y^d + C_{ea} M_y^e$$

$$+ C_{fa} M_y^f - \omega_1 M_z^a$$

$$(29)$$

$$dM_y^b/dt = (\omega_b - \omega) M_x^b + C_{ab} M_y^a - k_{2b} M_y^b - \omega_1 M_z^b$$

$$(30)$$

$$dM_y^c/dt = (\omega_c - \omega) M_x^c + C_{ac} M_y^a - k_{2c} M_y^c - \omega_1 M_z^c$$

$$(31)$$

$$dM_y^d/dt = (\omega_d - \omega) M_x^d + C_{ad} M_y^a - k_{2d} M_y^d - \omega_1 M_z^d$$

$$(32)$$

$$dM_y^e/dt = (\omega_e - \omega) M_x^e + C_{ae} M_y^a - k_{2e} M_y^e - \omega_1 M_z^e$$

$$(33)$$

$$dM_y^f/dt = (\omega_f - \omega) M_x^f + C_{af} M_y^a - k_{2f} M_y^f - \omega_1 M_z^f$$

$$(34)$$

$$dM_z^a/dt = \omega_1 M_y^a - k_{1a} M_z^a + C_{ba} M_z^b + C_{ca} M_z^c + C_{da} M_z^d + C_{ea} M_z^e$$

$$+ C_{fa} M_z^f + M_0^a / T_{1a}$$

$$(35)$$

$$dM_z^b/dt = \omega_1 M_y^b + C_{ab} M_z^a - k_{1b} M_z^b + M_0^b / T_{1b}$$

$$(36)$$

$$dM_z^c/dt = \omega_1 M_y^c + C_{ac} M_z^a - k_{1c} M_z^c + M_0^c / T_{1c}$$

$$(37)$$

$$dM_z^d/dt = \omega_1 M_y^d + C_{ad} M_z^a - k_{1d} M_z^d + M_0^d / T_{1d}$$

$$(38)$$

$$dM_z^e/dt = \omega_1 M_y^e + C_{ae} M_z^a - k_{1e} M_z^e + M_0^e / T_{1e}$$

$$(39)$$

$$dM_z^f/dt = \omega_1 M_y^f + C_{af} M_z^a - k_{1f} M_z^f + M_0^f / T_{1f}$$

$$(40)$$
